# Supplementary material
Source: Research Square preprint supplement (doi:10.21203/rs.3.rs-9020239/v1)
Supplement: Supplementary file 2 [file 1612cc20418155050079e4fe.docx]

Table 2. Effects on discharge rate, interspike interval variability, and common drive

|  | **Discharge rate (pps)** | | **∆ISI IQR (ms)** | | **CDC** | |
| --- | --- | --- | --- | --- | --- | --- |
| **Independent variables** | **Effect size (95% CI)** | ***P*** | **Effect size (95% CI)** | ***P*** | **Effect size (95% CI)** | ***P*** |
| Sitting to standing | 1.22 (0.75 – 1.69) | <0.0001 | 15.24 (7.83 – 22.65) | <0.0001 | NS |  |
| Spontaneous to voluntary | 0.65 (0.21 – 1.09) | 0.0042 | -20.62 (14.13 – 27.10) | 0.0001 | NS |  |
| Bilateral vs unilateral MU pair | NS |  | NS |  | -0.149 (-0.087 – -0.210) | <0.0001 |
| Change per ms increase in ISI | - |  | 0.29 (0.16 – 0.42) | <0.0001 | - |  |
| Total model RSquare | 0.81 |  | 0.60 |  | 0.99 |  |

ISI, inter-spike interval. ∆ISI IQR, inter-quartile range for differences between consecutive ISIs. MU, motor unit. CDC, common-drive coefficient. pps, pulses per second. ms, millisecond. CI, confidence interval. NS, not significant and consequently not included in the model.
