# Supplementary material
Source: Research Square preprint supplement (doi:10.21203/rs.3.rs-9020239/v1)
Supplement: Supplementary file 3 [file 1a1b1d5ab7a69bd75cf2a78f.docx]

**Table 1. Statistics, grouped data Total Spontaneous Spontaneous Voluntary**

**sitting standing standing**

**Subjects**

Number (m:f) 9 (8:1)

Age (years) (median; range) 38 (26–59)

Dominant side (right:left:missing) 7:1:1

Coffee consumption (cups/day) (median; range) 3 (0–8)

Electrodes recorded from (on target : off target) 16 (13:3)

Recording time (minutes) (sum; range) 241 (19–37) 119 (9–19) 114 (5–20) 9 (0.5–2.4)

**Gross muscle activity**

Gross activity recordings, subjects and sides, total material (n) 16 16 16 16

Duration of gross activity, subjects and sides, total material (min) 194 79 100 15

Duration of gross activity, per subject and side (s) (median; range) 169 (0–842) 369 (0–972) 43 (28–138)

Duration of gross activity, per subject and side (% of recording time; range) 22 (0–99) 56 (0–100) 98 (90–100)

**Single-unit activity within spike trains***

Units, total material (n) (on target : off target)† 69 (62:7) 24 (24:0) 29 (27:2) 28 (23:5)

Duration of analyzed single-unit activity, total material (minutes) 164 75 78 11

Duration of analyzed single-unit activity, per unit (s) 159 (53–278) 148 (78–253) 22 (17–30)

Duration of analyzed single-unit activity, per unit (% of recording time) 15 (7–27) 24 (8–31) 34 (27–85)

Intervals, total material (n) 59168 25403 29098 4667

Intervals, per unit (n) 1026 (248–1571) 943 (479–1459) 142 (105–252)

Median discharge rate, per unit (pps) 6.01 (5.09–6.33) 6.76 (5.84–7.99) 7.07 (5.86–8.40)

Mean discharge rate, per unit (pps) 5.92 (5.12–6.66) 6.81 (5.84–8.05) 7.24 (5.79–8.76)

Interquartile range for difference between
successive interspike intervals (∆ISI IQR) (ms) 34.4 (30.8–43.6) 45.6 (39.2–55.7) 24.3 (18.9–28.9)

Coefficient of variation for interspike intervals, per unit (%) 24.4 (22.0–31.3) 34.2 (30.1–37.4) 19.0 (15.6–25.9)

**Common drive coefficients**

Unit pairs, unilateral (n)‡ 49 16 21 14

Unit pairs, bilateral (n)¶ 55 9 29 19

CDC, unilateral 0.23 (0.14–0.34) 0.20 (0.11–0.40) 0.35 (0.14–0.47)

CDC, bilateral 0.09 (0.03–0.16) 0.10 (0.00–0.23) 0.15 (0.07–0.25)

Numbers are medians and quartiles unless otherwise specified

* Spike trains are defined as consecutive spikes with intervals <500 ms. All analyses of firing frequencies and ∆ISI IQR are in trains with ≥25 intervals; discharge rates higher than 250 pulses per second (pps) are excluded.

† 12 units were recorded from in more than one task: 4 in spontaneous sitting and spontaneous standing; 4 in spontaneous standing and voluntary standing; 4 in voluntary standing and spontaneous sitting. No unit was recorded from in all three tasks.

‡ 2 unit pairs were recorded from in more than one task: 1 in spontaneous sitting and spontaneous standing; 1 in spontaneous standing and voluntary standing. No unit was recorded from in all three tasks.

¶ 2 unit pairs were recorded from in more than one task: 1 in spontaneous sitting and spontaneous standing; 1 in spontaneous standing and voluntary standing. No unit was recorded from in all three tasks.
